# Supplementary material for: Severe Juvenile-Onset Systemic Lupus Erythematosus: A Case Series-Based Review and Update
Source: MDPI journal article supplement (doi:10.3390/children10050852), 2023-05-10
Supplement: s1 [file s1]

## Supplementary materials

**Table S1:** EULAR diagnostic criteria for aSLE.

| All: ANA > 1:80                  |                           |                                                                                                         | <i>points</i> |
|----------------------------------|---------------------------|---------------------------------------------------------------------------------------------------------|---------------|
| <b>CLINICAL<br/>DOMAINS</b>      | Constitutional            | Fever                                                                                                   | 2             |
|                                  | Cutaneous                 | Non-scarring alopecia                                                                                   | 2             |
|                                  |                           | Oral Ulcers                                                                                             | 2             |
|                                  |                           | Subacute cutaneous or discoid lupus                                                                     | 4             |
|                                  |                           | Acute cutaneous lupus                                                                                   | 6             |
|                                  | Arthritis                 | Synovitis or tenderness in at least 2 joints                                                            | 6             |
|                                  | Neurological              | Delirium                                                                                                | 2             |
|                                  |                           | Psychosis                                                                                               | 3             |
|                                  |                           | Seizure                                                                                                 | 5             |
|                                  | Serositis                 | Pleural or pericardial effusion                                                                         | 5             |
|                                  |                           | Acute pericarditis                                                                                      | 6             |
|                                  | Hematologic               | Leukopenia                                                                                              | 3             |
|                                  |                           | Thrombocytopenia                                                                                        | 4             |
|                                  |                           | Autoimmune hemolysis                                                                                    | 4             |
|                                  | Renal                     | Proteinuria > 0,5 g/24h                                                                                 | 4             |
|                                  |                           | Class I or II lupus nephritis                                                                           | 8             |
|                                  |                           | Class III or IV lupus nephritis                                                                         | 10            |
| <b>IMMUNOLOGICAL<br/>DOMAINS</b> | Antiphospholipid antibody | Anti-cardiolipin IgG > 40 <i>or</i><br>Anti-B2-glycoprotein 1 IgG > 40 <i>or</i><br>Lupus anticoagulant | 2             |
|                                  | Complement protein        | Low C3 or low C4                                                                                        | 3             |
|                                  |                           | Low C3 and low C3                                                                                       | 4             |
|                                  | High specific antibodies  | Anti-dsDNA antibody <i>or</i><br>Anti-SM antibody                                                       | 6             |
